# Supplementary material
Source: publisher figshare collection journal article supplement (https://aacr.figshare.com/articles/dataset/_/22746988)
Supplement: Supplementary file 1 [file 40423774]

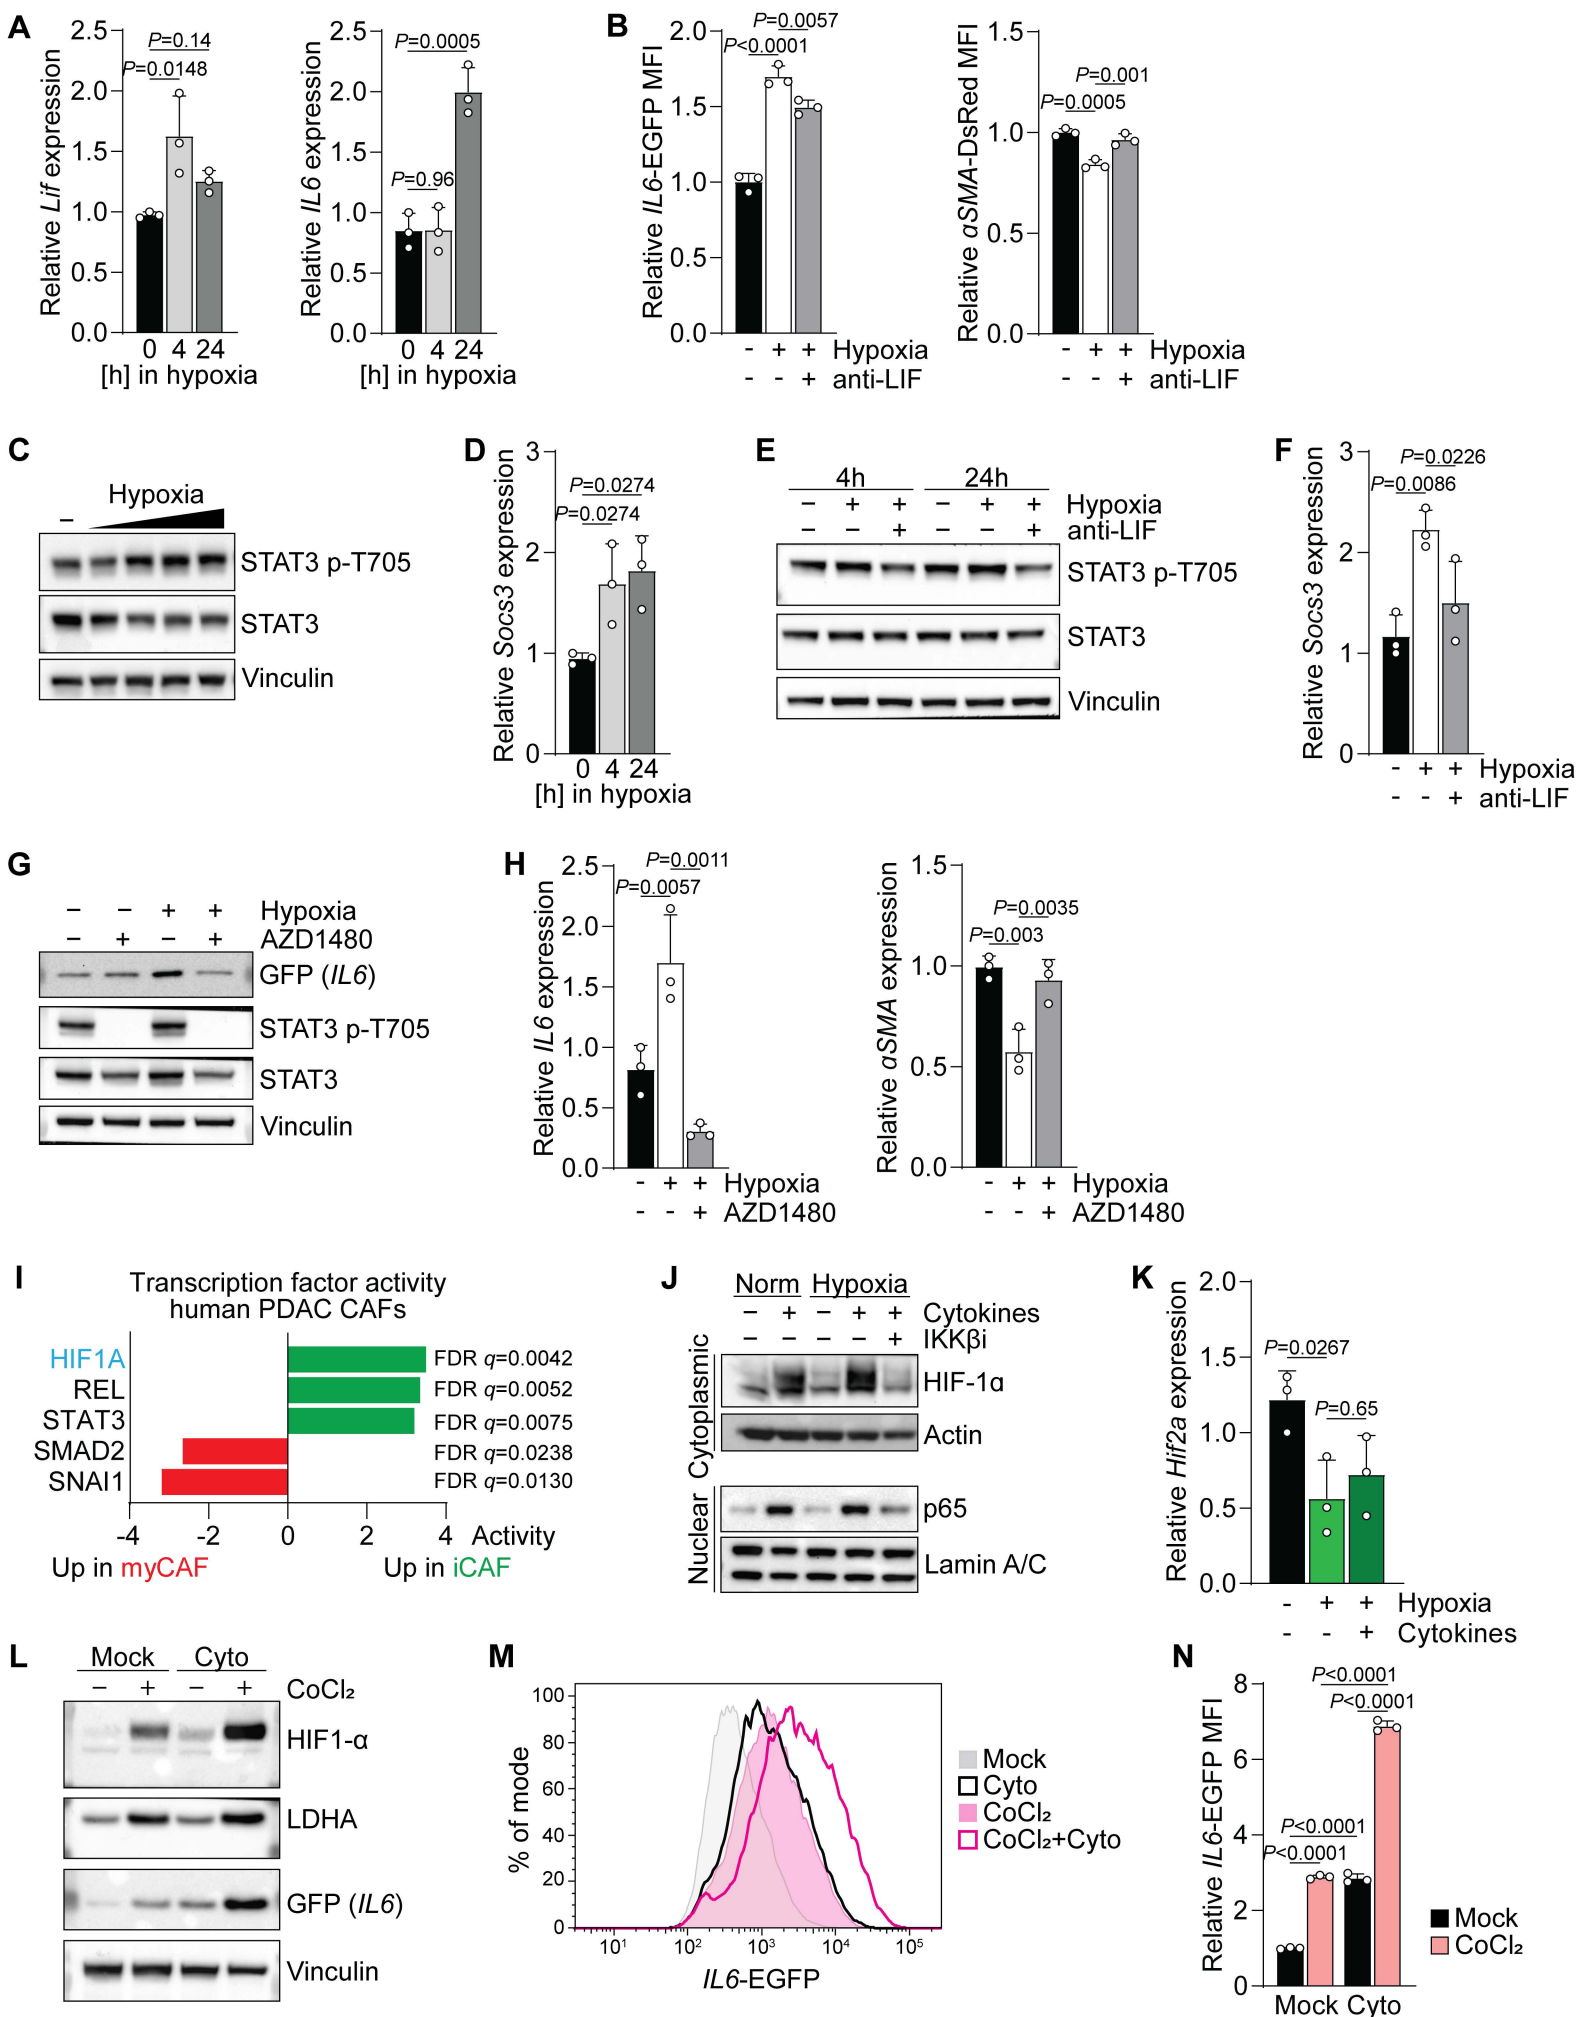

**Supplementary Figure 3, related to Figure 3**  
Continues on next page.

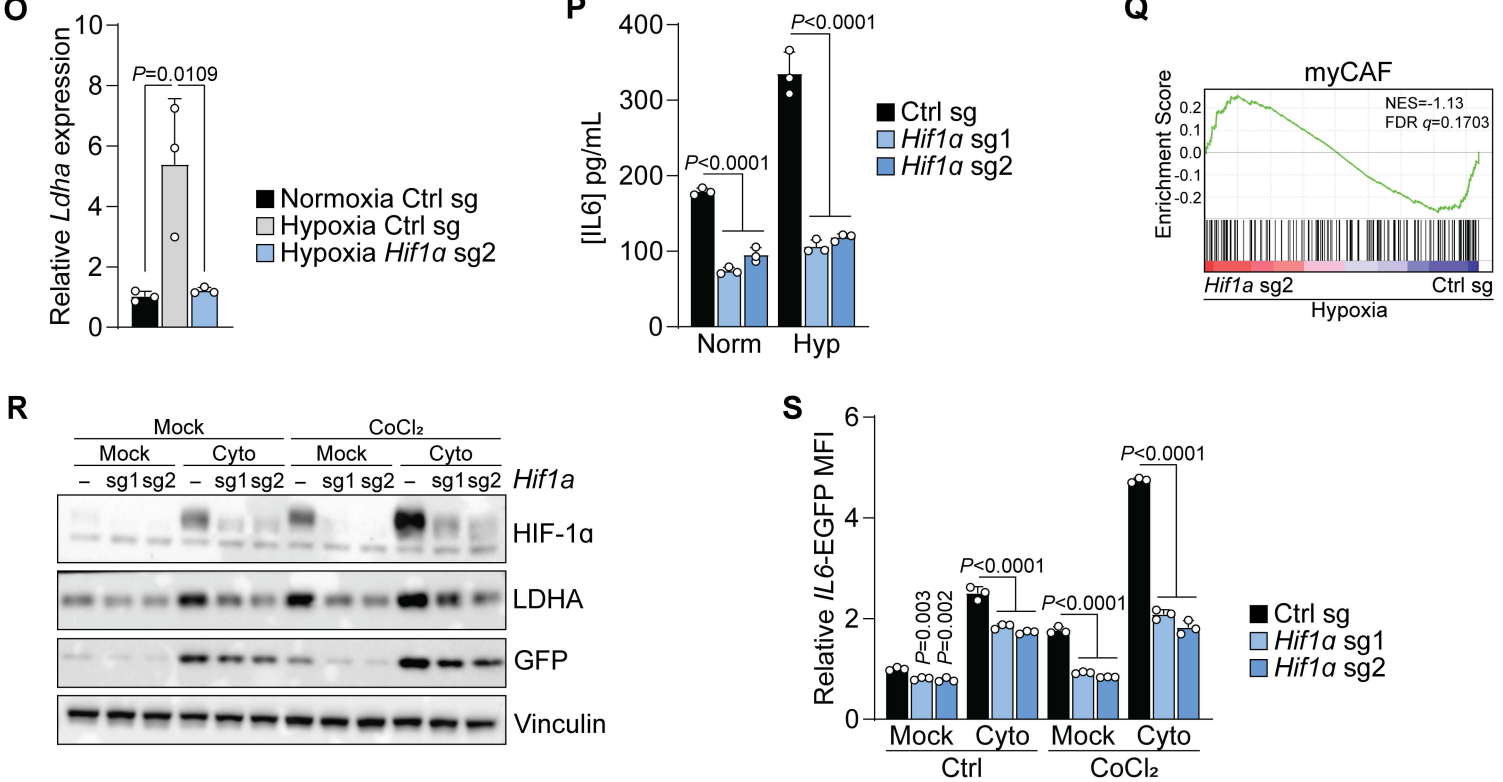

**Supplementary Figure 3, related to Figure 3**

(A, D) qPCR for the indicated transcripts in PSCs cultured in hypoxia for the indicated time. N=3 biological replicates. Data represent mean+SD. P-values were calculated by one-way ANOVA. (B) Quantification of the relative MFI of IL6-EGFP and  $\alpha$ SMA-DsRed in PSCs cultured in hypoxia for 24h and treated with IgG control or anti-LIF antibodies. N=3 biological replicates. Data represent mean+SD. P-values were calculated by one-way ANOVA. (C) Western blot of PSCs cultured in hypoxia for 15 min, 1 h, 4 h or 24 h. Representative experiment. (E, G) Western blot of PSCs cultured in hypoxia for 4 h or 24 h and treated with IgG control or anti-LIF antibodies (E) or for 24h and treated with the JAK inhibitor AZD1480 (G). Representative experiments. (F) qPCR for *Socs3* in PSCs cultured in hypoxia for 24h and treated with IgG control or anti-LIF antibodies. N=3 biological replicates. Data represent mean+SD. P-values were calculated by one-way ANOVA. (H) qPCR for the indicated transcripts in PSCs cultured in hypoxia for 24h and treated with the JAK inhibitor AZD1480. N=3 biological replicates. Data represent mean+SD. P-values were calculated by one-way ANOVA. (I) Activity of a selected set of transcription factors in myCAFs and iCAFs based on scRNA-seq data from human PDAC. Data from (5). (J) Western Blot of cytosolic and nuclear extracts of PSCs cultured in normoxia or hypoxia for 4h and treated with cytokines in the presence or absence of the IKK $\beta$  inhibitor MLN120B. Representative experiment. (K) qPCR for *Hif2a* in PSCs cultured in normoxia or hypoxia in the presence or absence of cytokines for 48h. N=3 biological replicates. Data represent mean+SD. P-values were calculated by one-way ANOVA. (L-N) PSCs expressing IL6-EGFP were mock treated, treated with 100  $\mu$ M CoCl<sub>2</sub>, cytokines or a combination thereof for 48h. (K) Western blot. Representative experiment. (L) Histogram of IL6-EGFP fluorescence intensity. (M) Quantification of relative MFI of IL6-EGFP. N=3 biological replicates. Data represent mean+SD. P-values were calculated by two-way ANOVA. (O) qPCR for *Ldha* in PSCs expressing control or *Hif1a* sgRNA and cultured in normoxia or hypoxia for 48h. N=3 biological replicates. Data represent mean+SD. P-values were calculated by one-way ANOVA. (P) Quantification of IL6 levels in media conditioned by PSCs expressing control or *Hif1a* sgRNA and cultured in normoxia or hypoxia for 48h. N=3 biological replicates. Data represent mean+SD. P-values were calculated by two-way ANOVA. (Q) GSEA comparing PSCs expressing control or *Hif1a* sgRNA and cultured in hypoxia for 48h. myCAF signature derived from (4). N=3 biological replicates. (R, S) PSCs expressing IL6-EGFP and control or *Hif1a* sgRNA were mock treated, treated with 100  $\mu$ M CoCl<sub>2</sub>, cytokines or a combination thereof for 48h. (R) Western blot. Representative experiment. (S) Quantification of relative MFI of IL6-EGFP. N=3 biological replicates. Data represent mean+SD. P-values were calculated by two-way ANOVA.
